# Supplementary material for: Tissue-specific sex differences in pediatric and adult immune cell composition and function
Source: PubMed Central journal article supplement (PMC11133680; doi:10.3389/fimmu.2024.1373537), 2024-05-15
Supplement: DataSheet_2.pdf [file DataSheet_2.pdf]

**Supplementary table 1. Tonsillectomy donor demographic information.** Samples were collected through the Cooperative Human Tissue Network (CHTN) or the UCI Medical Center (UCI). Although donor-specific diagnoses are not available for CHTN samples, the most common indication for surgery at the collection site is tonsillar hypertrophy. Donor age, sex, race, and indication for surgery come from patient medical records.

| donor    | age (years) | sex    | race and/or ethnicity      | source | surgical indication               |
|----------|-------------|--------|----------------------------|--------|-----------------------------------|
| 1        | 8           | male   | black                      | CHTN   | no data (likely hypertrophy)      |
| 2        | 16          | female | white                      | CHTN   | no data (likely hypertrophy)      |
| 3        | 5           | female | white                      | CHTN   | no data (likely hypertrophy)      |
| 4        | 2           | male   | white                      | CHTN   | no data (likely hypertrophy)      |
| 5        | 11          | male   | white                      | CHTN   | no data (likely hypertrophy)      |
| 6        | 9           | male   | black                      | CHTN   | no data (likely hypertrophy)      |
| 7        | 2           | female | white                      | CHTN   | no data (likely hypertrophy)      |
| 8        | 14          | male   | white                      | CHTN   | no data (likely hypertrophy)      |
| 9        | 11          | female | white                      | CHTN   | no data (likely hypertrophy)      |
| 10       | 12          | female | white                      | CHTN   | no data (likely hypertrophy)      |
| 11       | 3           | male   | black                      | CHTN   | no data (likely hypertrophy)      |
| 12       | 2           | female | black                      | CHTN   | no data (likely hypertrophy)      |
| 13       | 11          | female | white                      | CHTN   | no data (likely hypertrophy)      |
| 14       | 10          | female | black                      | CHTN   | no data (likely hypertrophy)      |
| 15       | 8           | female | black                      | CHTN   | no data (likely hypertrophy)      |
| 16       | 2           | female | white                      | CHTN   | no data (likely hypertrophy)      |
| 17       | 10          | female | white                      | CHTN   | no data (likely hypertrophy)      |
| 18       | 2           | male   | white                      | CHTN   | no data (likely hypertrophy)      |
| 19       | 9           | female | black                      | CHTN   | no data (likely hypertrophy)      |
| 20       | 12          | male   | white                      | CHTN   | no data (likely hypertrophy)      |
| 21       | 14          | female | white                      | CHTN   | no data (likely hypertrophy)      |
| 22       | 2           | male   | white                      | CHTN   | no data (likely hypertrophy)      |
| 23       | 3           | female | white                      | CHTN   | no data (likely hypertrophy)      |
| 24       | 8           | male   | white                      | CHTN   | no data (likely hypertrophy)      |
| 25       | 5           | male   | white                      | CHTN   | no data (likely hypertrophy)      |
| 26       | 8           | female | white                      | CHTN   | no data (likely hypertrophy)      |
| 27       | 13          | female | white                      | CHTN   | no data (likely hypertrophy)      |
| 28       | 13          | male   | white                      | CHTN   | no data (likely hypertrophy)      |
| 29       | 17          | female | black                      | CHTN   | no data (likely hypertrophy)      |
| 30       | 8           | male   | white                      | CHTN   | no data (likely hypertrophy)      |
| 31       | 3           | female | white                      | CHTN   | no data (likely hypertrophy)      |
| 32       | 2           | male   | white                      | CHTN   | no data (likely hypertrophy)      |
| 33       | 8           | female | white                      | CHTN   | no data (likely hypertrophy)      |
| 34       | 6           | male   | white                      | CHTN   | no data (likely hypertrophy)      |
| 35       | 2           | female | white                      | CHTN   | no data (likely hypertrophy)      |
| 36       | 3           | male   | white                      | CHTN   | no data (likely hypertrophy)      |
| 37       | 4           | male   | white                      | CHTN   | no data (likely hypertrophy)      |
| 38       | 2           | male   | white                      | CHTN   | no data (likely hypertrophy)      |
| 39       | 7           | female | white                      | CHTN   | no data (likely hypertrophy)      |
| 40       | 2           | male   | white                      | CHTN   | no data (likely hypertrophy)      |
| UCIMC002 | 20          | female | white, not hispanic/latino | UCI    | recurrent tonsillitis             |
| UCIMC012 | 21          | male   | white, not hispanic/latino | UCI    | recurrent tonsillitis/hypertrophy |
| UCIMC014 | 28          | female | white, hispanic/latino     | UCI    | recurrent tonsillitis/hypertrophy |
| UCIMC029 | 26          | male   | white, hispanic/latino     | UCI    | recurrent tonsillitis/hypertrophy |
| UCIMC015 | 20          | female | white, not hispanic/latino | UCI    | recurrent tonsillitis             |
| UCIMC026 | 19          | male   | white, hispanic/latino     | UCI    | recurrent tonsillitis             |
| UCIMC013 | 23          | female | white, hispanic/latino     | UCI    | recurrent tonsillitis/hypertrophy |
| UCIMC023 | 22          | male   | asian, hispanic/latino     | UCI    | recurrent tonsillitis             |
| UCIMC028 | 34          | female | asian, not hispanic/latino | UCI    | recurrent tonsillitis/hypertrophy |
| UCIMC011 | 37          | male   | white, hispanic/latino     | UCI    | hypertrophy                       |
| UCIMC006 | 25          | female | white, hispanic/latino     | UCI    | recurrent tonsillitis             |

| <b>Supplementary table 2: Flow cytometry panel for characterizing the B cells</b> |                     |                    |               |
|-----------------------------------------------------------------------------------|---------------------|--------------------|---------------|
| <b>Cell surface Marker</b>                                                        | <b>Fluorochrome</b> | <b>Catalog no.</b> | <b>Vendor</b> |
| CD138                                                                             | FITC                | 356508             | Biolegend     |
| CD45                                                                              | PerCP-Cy5.5         | 368504             | Biolegend     |
| IgD                                                                               | APC                 | 348222             | Biolegend     |
| CD21                                                                              | AF700               | 354918             | Biolegend     |
| CD83                                                                              | APC-Cy7             | 305330             | Biolegend     |
| CXCR4                                                                             | BV421               | 306518             | Biolegend     |
| Zombie                                                                            | Amcyan              | 423102             | Biolegend     |
| CD73                                                                              | BV605               | 344023             | Biolegend     |
| CD19                                                                              | BV650               | 302238             | Biolegend     |
| CD39                                                                              | BV785               | 328240             | Biolegend     |
| CD45RB                                                                            | PE                  | 310204             | Biolegend     |
| CD38                                                                              | PE-Dazzle594        | 303538             | Biolegend     |
| CD3                                                                               | PE-Cy5              | 300310             | Biolegend     |
| CD27                                                                              | PE-Cy7              | 302838             | Biolegend     |

| <b>Supplementary table 3: Flow cytometry panel for characterizing the T cells</b> |                     |                    |               |
|-----------------------------------------------------------------------------------|---------------------|--------------------|---------------|
| <b>Cell surface Marker</b>                                                        | <b>Fluorochrome</b> | <b>Catalog no.</b> | <b>Vendor</b> |
| CD8                                                                               | FITC                | 344704             | Biolegend     |
| CCR7                                                                              | PerCP-Cy5.5         | 353220             | Biolegend     |
| PD-1                                                                              | APC                 | 367406             | Biolegend     |
| CD3                                                                               | AF700               | 300324             | Biolegend     |
| CD25                                                                              | APC-Cy7             | 302614             | Biolegend     |
| CCR4                                                                              | BV421               | 359414             | Biolegend     |
| Zombie                                                                            | Amcyan              | 423102             | Biolegend     |
| CD127                                                                             | BV605               | 351334             | Biolegend     |
| CCR6                                                                              | BV650               | 353426             | Biolegend     |
| CXCR3                                                                             | BV711               | 353732             | Biolegend     |
| CD45RA                                                                            | BV785               | 304140             | Biolegend     |
| TCRgd                                                                             | PE                  | MHGD04             | Invitrogen    |
| CD56                                                                              | PE-Dazzle594        | 362544             | Biolegend     |
| CD4                                                                               | PE-Cy5              | 317412             | Biolegend     |
| CXCR5                                                                             | PE-Cy7              | 356924             | Biolegend     |

**Supplementary table 4: Flow cytometry panel for identifying the HA+ B cell subsets**

| Cell surface Marker | Fluorochrome | Catalog no. | Vendor     |
|---------------------|--------------|-------------|------------|
| CD19                | BV650        | 302238      | Biolegend  |
| CD3                 | BV605        | 317322      | Biolegend  |
| CD27                | PE-Cy7       | 302838      | Biolegend  |
| CD38                | PE-Dazzle594 | 303538      | Biolegend  |
| IgD                 | APC/cy7      | 348218      | Biolegend  |
| Zombie              | Amcyan       | 423102      | Biolegend  |
| Streptavidin        | PE           | 12-4317-87  | Invitrogen |
| Streptavidin        | APC          | 17-4317-82  | Invitrogen |

**Supplementary table 5: Coating antigens for ELISA using LAIV 2019-20 vaccine strained matched HA**

| Protein Type                               | Coating antigen           | Catalog no.     | Vendor            |
|--------------------------------------------|---------------------------|-----------------|-------------------|
| LAIV 2019-2000 HA (vaccine strain matched) | A/Brisbane/02/2018 (H1N1) | IT-003-0011ΔTMp | Immune Technology |
|                                            | A/Kansas/14/2017 (H3N2)   | IT-003-00436p   | Immune Technology |
|                                            | B/Phuket/3073/2013        | IT-003-B11ΔTMp  | Immune Technology |
|                                            | B/Colorado/06/2017        | IT-003-B21ΔTMP  | Immune Technology |

**Supplementary Table 6. Protein microarray influenza strains**

| Name                                                  | Strain | Strain year | Protein | Vendor          | Catalog no. |
|-------------------------------------------------------|--------|-------------|---------|-----------------|-------------|
| A/Cambodia/e0826360/2020                              | H3N2   | 2020        | HA      | Sino Biological | 40789-V08H1 |
| A/Cambodia/e0826360/2020                              | H3N2   | 2020        | HA      | Sino Biological | 40789-V08H  |
| A/Wisconsin/588/2019 / A/Victoria/2570/2019           | H1N1   | 2019        | HA      | Sino Biological | 40787-V08H1 |
| A/Guangdong-Maonan/SWL1536/2019) / (A/Hawaii/70/2019) | H1N1   | 2019        | HA      | Sino Biological | 40717-V08H  |
| A/Hong Kong/2671/2019                                 | H3N2   | 2019        | HA      | Sino Biological | 40721-V08H  |
| B/Washington/02/2019                                  | B      | 2019        | HA      | Sino Biological | 40722-V08H  |
| A/Brisbane/02/2018                                    | H1N1   | 2018        | HA      | Sino Biological | 40719-V08H  |
| A/Kansas/14/2017                                      | H3N2   | 2017        | HA      | Sino Biological | 40720-V08H  |
| B/Colorado/06/2017                                    | B      | 2017        | HA      | Sino Biological | 40581-V08H  |
| A/Singapore/INFIMH-16-0019/2016                       | H3N2   | 2016        | HA      | Sino Biological | 40580-V08H  |
| A/Michigan/45/2015                                    | H1N1   | 2015        | HA      | Sino Biological | 40567-V08H1 |
| A/Michigan/45/2015                                    | H1N1   | 2015        | NA      | Sino Biological | 40568-V07H  |
| A/Missouri/09/2014                                    | H3N2   | 2014        | HA      | Sino Biological | 40494-V08B  |

|                                                |        |      |    |                 |             |
|------------------------------------------------|--------|------|----|-----------------|-------------|
| A/Switzerland/9715293/2013                     | H3N2   | 2013 | HA | Sino Biological | 40497-V08B  |
| A/pigeon/Shanghai/S1069/2013                   | H7N9   | 2013 | HA | Sino Biological | 40106-V08H  |
| A/Anhui/1/2013                                 | H7N9   | 2013 | HA | Sino Biological | 40103-V08H  |
| A/Shanghai/1/2013                              | H7N9   | 2013 | HA | Sino Biological | 40104-V08H  |
| A/Shanghai/2/2013                              | H7N9   | 2013 | HA | Sino Biological | 40239-V08H  |
| A/Hangzhou/1/2013                              | H7N9   | 2013 | HA | Sino Biological | 40105-V08H  |
| A/JiangxiDonghu/346/2013                       | H10N8  | 2013 | HA | Sino Biological | 40359-V08B  |
| B/Phuket/3073/2013                             | B      | 2013 | HA | Sino Biological | 40498-V08H1 |
| A/Anhui/1/2013                                 | H7N9   | 2013 | NA | Sino Biological | 40108-V07H  |
| A/Shanghai/1/2013                              | H7N9   | 2013 | NA | Sino Biological | 40109-V07H  |
| B/Phuket/3073/2013                             | B      | 2013 | NA | Sino Biological | 40502-V07B  |
| A/Texas/50/2012                                | H3N2   | 2012 | HA | Sino Biological | 40354-V08B  |
| B/Wisconsin/02/2012                            | B      | 2012 | HA | Sino Biological | 40462-V08H1 |
| B/Utah/02/2012                                 | B      | 2012 | HA | Sino Biological | 40463-V08H1 |
| A/HongKong/CUHK31987/2011                      | H3N2   | 2011 | HA | Sino Biological | 40146-V08B  |
| A/Victoria/361/2011                            | H3N2   | 2011 | HA | Sino Biological | 40145-V08B  |
| A/chicken/Guangdong/C273/2011                  | H6N2   | 2011 | HA | Sino Biological | 40398-V08B  |
| A/Hubei/1/2011                                 | H5N1   | 2011 | NA | Sino Biological | 40018-V07H  |
| A/barnswallow/HongKong/D101161/2010            | H5N1   | 2010 | HA | Sino Biological | 40160-V08B  |
| A/Hubei/1/2010                                 | H5N1   | 2010 | HA | Sino Biological | 40015-V08H  |
| A/flatfacedbat/Peru/033/2010                   | H18N11 | 2010 | HA | Sino Biological | 40324-V08B  |
| B/Massachusetts/03/2010                        | B      | 2010 | HA | Sino Biological | 40191-V08H1 |
| A/California/06/2009                           | H1N1   | 2009 | HA | Sino Biological | 40350-V08B  |
| A/Texas/05/2009                                | H1N1   | 2009 | HA | Sino Biological | 40006-V08H  |
| A/England/195/2009                             | H1N1   | 2009 | HA | Sino Biological | 40005-V08H  |
| A/Beijing/22808/2009                           | H1N1   | 2009 | HA | Sino Biological | 40035-V08H  |
| A/Ohio/07/2009                                 | H1N1   | 2009 | HA | Sino Biological | 40007-V08H  |
| A/NewYork/18/2009                              | H1N1   | 2009 | HA | Sino Biological | 40009-V08H  |
| A/California/07/2009 HA1+HA2 His tag           | H1N1   | 2009 | HA | Sino Biological | 11085-V08H  |
| A/California/04/2009                           | H1N1   | 2009 | HA | Sino Biological | 11055-V08H  |
| A/Hanoi/EL201/2009                             | H3N2   | 2009 | HA | Sino Biological | 40490-V08B  |
| A/Victoria/208/2009                            | H3N2   | 2009 | HA | Sino Biological | 40151-V08B  |
| A/Perth/16/2009                                | H3N2   | 2009 | HA | Sino Biological | 40043-V08H  |
| A/GuangdongLuohu/1256/2009                     | H3N2   | 2009 | HA | Sino Biological | 40152-V08B  |
| A/Perth/16/2009                                | H3N2   | 2009 | HA | Sino Biological | 40043-V08B1 |
| A/duck/Hunan/819/2009                          | H4N2   | 2009 | HA | Sino Biological | 40390-V08B  |
| A/Egypt/N05056/2009                            | H5N1   | 2009 | HA | Sino Biological | 11702-V08H  |
| A/HongKong/35820/2009                          | H9N2   | 2009 | HA | Sino Biological | 40174-V08B  |
| A/littleyellowshoulderedbat/Guatemala/164/2009 | H17N10 | 2009 | HA | Sino Biological | 40323-V08B  |

|                                            |       |      |     |                 |             |
|--------------------------------------------|-------|------|-----|-----------------|-------------|
| A/California/04/2009                       | H1N1  | 2009 | NA  | Sino Biological | 11058-V07B  |
| A/California/04/2009                       | H1N1  | 2009 | NA  | Sino Biological | 11058-V08B  |
| A/California/07/2009                       | H1N1  | 2009 | NP  | Sino Biological | 40205-V08B  |
| H1N1A/California/04/09                     | H1N1  | 2009 | NS1 | eEnzyme         | IA-NS1-021P |
| A/Hanoi/EL134/2008                         | H3N2  | 2008 | HA  | Sino Biological | 40489-V08B  |
| A/chicken/Vietnam/NCVD016/2008             | H5N1  | 2008 | HA  | Sino Biological | 40158-V08B  |
| A/Vietnam/UT31413II/2008                   | H5N1  | 2008 | HA  | Sino Biological | 40022-V08H  |
| A/Cambodia/S1211394/2008                   | H5N1  | 2008 | HA  | Sino Biological | 40026-V08H  |
| A/HongKong/3239/2008                       | H9N2  | 2008 | HA  | Sino Biological | 40178-V08B  |
| B/Brisbane/60/2008                         | B     | 2008 | HA  | Sino Biological | 40016-V08H1 |
| B/Brisbane/60/2008                         | B     | 2008 | NA  | Sino Biological | 40203-VNAHC |
| A/Brisbane/59/2007                         | H1N1  | 2007 | HA  | Sino Biological | 11052-V08H  |
| A/Ohio/UR060991/2007                       | H1N1  | 2007 | HA  | Sino Biological | 11687-V08H  |
| A/Brisbane/10/2007                         | H3N2  | 2007 | HA  | Sino Biological | 11056-V08H  |
| A/commonmagpie/HongKong/5052/2007          | H5N1  | 2007 | HA  | Sino Biological | 40044-V08H  |
| A/Cambodia/R0405050/2007                   | H5N1  | 2007 | HA  | Sino Biological | 11710-V08H  |
| A/Egypt/2321NAMRU3/2007                    | H5N1  | 2007 | HA  | Sino Biological | 11697-V08H  |
| A/northernshoveler/California/HKWF115/2007 | H6N1  | 2007 | HA  | Sino Biological | 11723-V08H  |
| A/mallard/Minnesota/SG00194/2007           | H10N3 | 2007 | HA  | Sino Biological | 40184-V08B  |
| A/bluewingedteal/Louisiana/SG00073/2007    | H10N7 | 2007 | HA  | Sino Biological | 40433-V08B  |
| A/thickbilledmurre/Newfoundland/031/2007   | H11N2 | 2007 | HA  | Sino Biological | 40187-V08B  |
| B/Brisbane/3/2007                          | B     | 2007 | HA  | Sino Biological | 40431-V08H1 |
| A/Egypt/2321NAMRU3/2007                    | H5N1  | 2007 | NA  | Sino Biological | 40045-VNAHC |
| A/SolomonIslands/3/2006                    | H1N1  | 2006 | HA  | Sino Biological | 11708-V08H  |
| A/Xinjiang/1/2006                          | H5N1  | 2006 | HA  | Sino Biological | 40004-V08H  |
| A/chicken/India/NIV33487/2006              | H5N1  | 2006 | HA  | Sino Biological | 11712-V08H  |
| A/commonmagpie/HongKong/2256/2006          | H5N1  | 2006 | HA  | Sino Biological | 11700-V08H  |
| A/goose/Guiyang/337/2006                   | H5N1  | 2006 | HA  | Sino Biological | 11690-V08H  |
| A/mallard/Netherlands/33/2006              | H7N8  | 2006 | HA  | Sino Biological | 40172-V08B  |
| A/ruddyturnstone/NewJersey/563/2006        | H7N2  | 2006 | HA  | Sino Biological | 40170-V08B  |
| B/Florida/4/2006                           | B     | 2006 | HA  | Sino Biological | 11053-V08H1 |
| B/Florida/4/2006                           | B     | 2006 | NP  | Sino Biological | 40438-V08B  |
| A/Canada/720/2005                          | H2N2  | 2005 | HA  | Sino Biological | 11688-V08H  |
| A/Wisconsin/67/2005                        | H3N2  | 2005 | HA  | Sino Biological | 11972-V08H  |
| A/barheadedgoose/Qinghai/1A/2005           | H5N1  | 2005 | HA  | Sino Biological | 40117-V08B  |
| A/Anhui/1/2005                             | H5N1  | 2005 | HA  | Sino Biological | 11048-V08H4 |
| A/whooperswan/Mongolia/244/2005            | H5N1  | 2005 | HA  | Sino Biological | 11709-V08H  |
| B/Ohio/01/2005                             | B     | 2005 | HA  | Sino Biological | 40460-V08H1 |
| A/Babol/36/2005                            | H3N2  | 2005 | NA  | Sino Biological | 40017-V07H  |

|                                      |       |      |    |                 |              |
|--------------------------------------|-------|------|----|-----------------|--------------|
| A/Anhui/1/2005                       | H5N1  | 2005 | NA | Sino Biological | 11676-VNAHC1 |
| A/California/7/2004                  | H3N2  | 2004 | HA | Sino Biological | 40118-V08B   |
| A/chicken/Jilin/9/2004               | H5N1  | 2004 | HA | Sino Biological | 40372-V08B   |
| A/chicken/Yamaguchi/7/2004           | H5N1  | 2004 | HA | Sino Biological | 40088-V08H   |
| B/Florida/07/2004                    | B     | 2004 | HA | Sino Biological | 40432-V08H1  |
| B/Malaysia/2506/2004                 | B     | 2004 | HA | Sino Biological | 11716-V08H1  |
| A/Thailand/1(KAN-1)/2004             | H5N1  | 2004 | NA | Sino Biological | 40064-V07H   |
| A/Wyoming/03/2003                    | H3N2  | 2003 | HA | Sino Biological | 11715-V08H   |
| A/HongKong/213/2003                  | H5N1  | 2003 | HA | Sino Biological | 11713-V08H   |
| A/chicken/Netherlands/1/2003         | H7N7  | 2003 | HA | Sino Biological | 11212-V08B   |
| A/Netherlands/219/2003               | H7N7  | 2003 | HA | Sino Biological | 11082-V08B   |
| A/shorebird/Delaware/261/2003        | H9N5  | 2003 | HA | Sino Biological | 40181-V08B   |
| A/Philippines/472/2002               | H3N2  | 2002 | HA | Sino Biological | 40487-V08B   |
| A/Fujian/411/2002                    | H3N2  | 2002 | HA | Sino Biological | 40488-V08B   |
| A/mallard/Ohio/657/2002              | H4N6  | 2002 | HA | Sino Biological | 11714-V08H   |
| A/duck/Hunan/795/2002                | H5N1  | 2002 | HA | Sino Biological | 11698-V08H   |
| A/turkey/Italy/214845/2002           | H7N3  | 2002 | HA | Sino Biological | 40128-V08B   |
| A/duck/Yangzhou/906/2002             | H11N2 | 2002 | HA | Sino Biological | 11705-V08H   |
| A/duck/Shantou/83/2000               | H6N2  | 2000 | HA | Sino Biological | 40166-V08B   |
| A/blackheadedgull/Netherlands/1/2000 | H13N8 | 2000 | HA | Sino Biological | 11721-V08H   |
| B/Victoria/504/2000                  | B     | 2000 | HA | Sino Biological | 40391-V08H   |
| A/NewCaledonia/20/1999               | H1N1  | 1999 | HA | Sino Biological | 11683-V08H   |
| A/Moscow/10/1999                     | H3N2  | 1999 | HA | Sino Biological | 40154-V08B   |
| A/swine/Ontario/019111/1999          | H4N6  | 1999 | HA | Sino Biological | 11706-V08H   |
| A/HongKong/1073/1999                 | H9N2  | 1999 | HA | Sino Biological | 11229-V08H   |
| A/guineafowl/HongKong/WF10/1999      | H9N2  | 1999 | HA | Sino Biological | 11719-V08H   |
| A/blackheadedgull/Sweden/1/1999      | H13N6 | 1999 | HA | Sino Biological | 40190-V08B   |
| A/blackheadedgull/Sweden/5/1999      | H16N3 | 1999 | HA | Sino Biological | 11711-V08H   |
| A/swine/Belgium/1/1998               | H1N1  | 1998 | HA | Sino Biological | 40393-V08B   |
| A/mallard/Ohio/217/1998              | H6N8  | 1998 | HA | Sino Biological | 40168-V08B   |
| A/Sydney/5/1997                      | H3N2  | 1997 | HA | Sino Biological | 40149-V08B   |
| A/duck/HongKong/P46/1997             | H5N1  | 1997 | HA | Sino Biological | 40001-V08H   |
| A/HongKong/483/1997                  | H5N1  | 1997 | HA | Sino Biological | 11689-V08H   |
| A/chicken/HongKong/G9/1997           | H9N2  | 1997 | HA | Sino Biological | 40036-V08H   |
| A/goose/Guangdong/1/1996             | H5N1  | 1996 | HA | Sino Biological | 40024-V08B   |
| A/Beijing/262/1995                   | H1N1  | 1995 | HA | Sino Biological | 40133-V08B   |
| A/Netherlands/178/1995               | H3N2  | 1995 | HA | Sino Biological | 40486-V08B   |
| A/Nanchang/933/1995                  | H3N2  | 1995 | HA | Sino Biological | 40485-V08B   |
| A/Johannesburg/33/1994               | H3N2  | 1994 | HA | Sino Biological | 40476-V08B   |

|                                                 |       |      |     |                 |             |
|-------------------------------------------------|-------|------|-----|-----------------|-------------|
| A/Texas/36/1991                                 | H1N1  | 1991 | HA  | Sino Biological | 40132-V08B  |
| A/greenwingedteal/ALB/199/1991                  | H12N5 | 1991 | HA  | Sino Biological | 11718-V08H  |
| B/Yamagata/16/1988                              | B     | 1988 | HA  | Sino Biological | 40157-V08H1 |
| B/Victoria/02/1987                              | B     | 1987 | HA  | Sino Biological | 40163-V08H  |
| A/duck/NewZealand/76/1984                       | H9N1  | 1984 | HA  | Sino Biological | 40179-V08B  |
| A/mallardduck/Alberta/342/1983                  | H12N1 | 1983 | HA  | Sino Biological | 40029-V08H  |
| A/australianshelduck/WesternAustralia/1756/1983 | H15N2 | 1983 | HA  | Sino Biological | 40193-V08B  |
| A/duck/Australia/341/1983                       | H15N8 | 1983 | HA  | Sino Biological | 11720-V08H  |
| A/mallard/Astrakhan/263/1982                    | H14N5 | 1982 | HA  | Sino Biological | 40192-V08B  |
| A/pintailduck/Alberta/115/1979                  | H8N4  | 1979 | HA  | Sino Biological | 11722-V08H  |
| A/duck/HongKong/562/1979                        | H10N9 | 1979 | HA  | Sino Biological | 40028-V08H  |
| A/duck/HongKong/786/1979                        | H10N3 | 1979 | HA  | Sino Biological | 11693-V08H  |
| A/duck/HongKong/448/1978                        | H9N2  | 1978 | HA  | Sino Biological | 40003-V08B  |
| A/USSR/90/1977                                  | H1N1  | 1977 | HA  | Sino Biological | 40134-V08B  |
| A/mallardduck/Alberta/299/1977                  | H4N4  | 1977 | HA  | Sino Biological | 40008-V08H  |
| A/chicken/HongKong/17/1977                      | H6N4  | 1977 | HA  | Sino Biological | 40027-V08H  |
| A/mallard/Alberta/294/1977                      | H11N9 | 1977 | HA  | Sino Biological | 11704-V08H  |
| A/USSR/90/1977                                  | H1N1  | 1977 | NA  | Sino Biological | 40197-V07H  |
| A/NewJersey/8/1976                              | H1N1  | 1976 | HA  | Sino Biological | 40392-V08B  |
| A/chicken/Alabama/1/1975                        | H4N8  | 1975 | HA  | Sino Biological | 40025-V08H  |
| B/HongKong/05/1973                              | B     | 1973 | HA  | Sino Biological | 40461-V08H1 |
| A/Aichi/2/1968                                  | H3N2  | 1968 | HA  | Sino Biological | 11707-V08H  |
| A/Aichi/2/1968                                  | H3N2  | 1968 | NA  | Sino Biological | 40199-V07H  |
| A/Aichi/2/1968                                  | H3N2  | 1968 | M1  | Sino Biological | 40215-V07E  |
| A/Hong Kong/1/1968                              | H3N2  | 1968 | NP  | Sino Biological | 40208-V08B  |
| A/Aichi/2/1968                                  | H3N2  | 1968 | NP  | Sino Biological | 40207-V08B  |
| A/Guiyang/1/1957                                | H2N2  | 1957 | HA  | Sino Biological | 40119-V08B  |
| A/Japan/305/1957                                | H2N2  | 1957 | HA  | Sino Biological | 11088-V08H  |
| A/Albany/12/1951                                | H1N1  | 1951 | HA  | Sino Biological | 40464-V08B  |
| A/PuertoRico/8/1934                             | H1N1  | 1934 | HA  | Sino Biological | 11684-V08H  |
| A/PuertoRico/8/1934                             | H1N1  | 1934 | NA  | Sino Biological | 40196-VNAHC |
| A/Puerto Rico/8/34/Mount Sinai                  | H1N1  | 1934 | M1  | Sino Biological | 40010-V07E  |
| A/Puerto Rico/8/34/Mount Sinai                  | H1N1  | 1934 | NP  | Sino Biological | 11675-V08B  |
| A/Puerto Rico/8/34/Mount Sinai                  | H1N1  | 1934 | NS1 | Sino Biological | 40011-V07E  |
| A/Puerto Rico/8/34/Mount Sinai                  | H1N1  | 1934 | NS2 | Sino Biological | 40012-VNAE  |
| A/WSN/1933                                      | H1N1  | 1933 | HA  | Sino Biological | 11692-V08H  |
| A/NewYork/1/1918                                | H1N1  | 1918 | HA  | Sino Biological | 40090-V08B  |
| A/BrevigMission/1/1918                          | H1N1  | 1918 | HA  | Sino Biological | 11068-V08H  |
| A/Brevig Mission/1/1918                         | H1N1  | 1918 | M1  | Sino Biological | 40211-V07E  |
